# Supplementary figures and images for: Simple and accurate transcriptional start site identification using Smar2C2 and examination of conserved promoter features
Source: PubMed Central journal article supplement — Plant J. 2022 Oct 2;112(2):583–96. doi: 10.1111/tpj.15957 (PMC9827901; doi:10.1111/tpj.15957), 2022-10-02

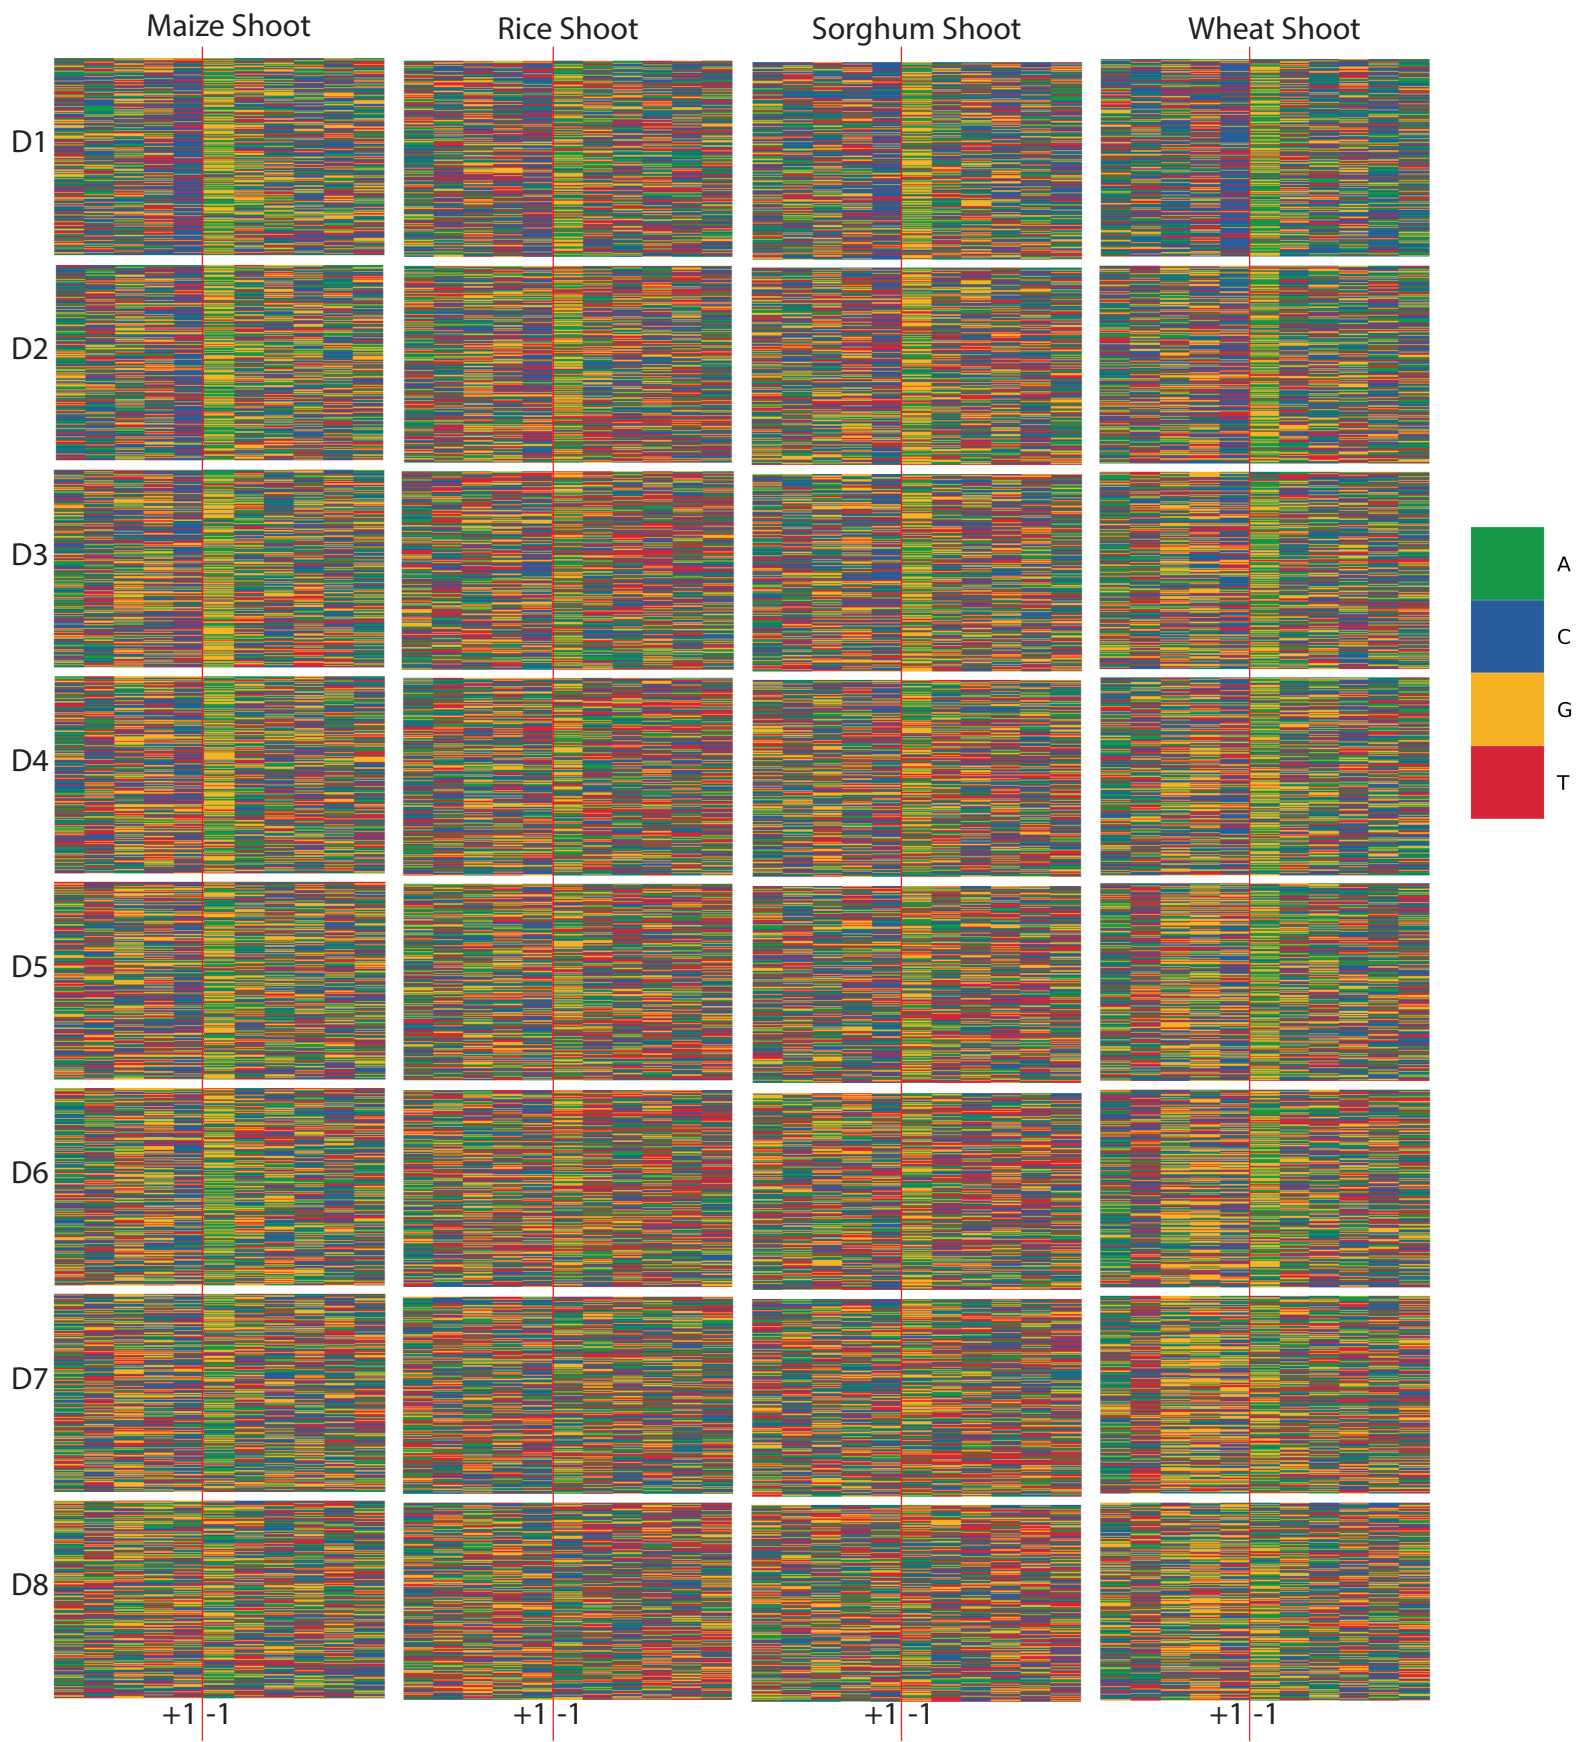

Supplementary Figure 5

Supplement: TPJ-112-583-s001.pdf [file TPJ-112-583-s001.pdf]

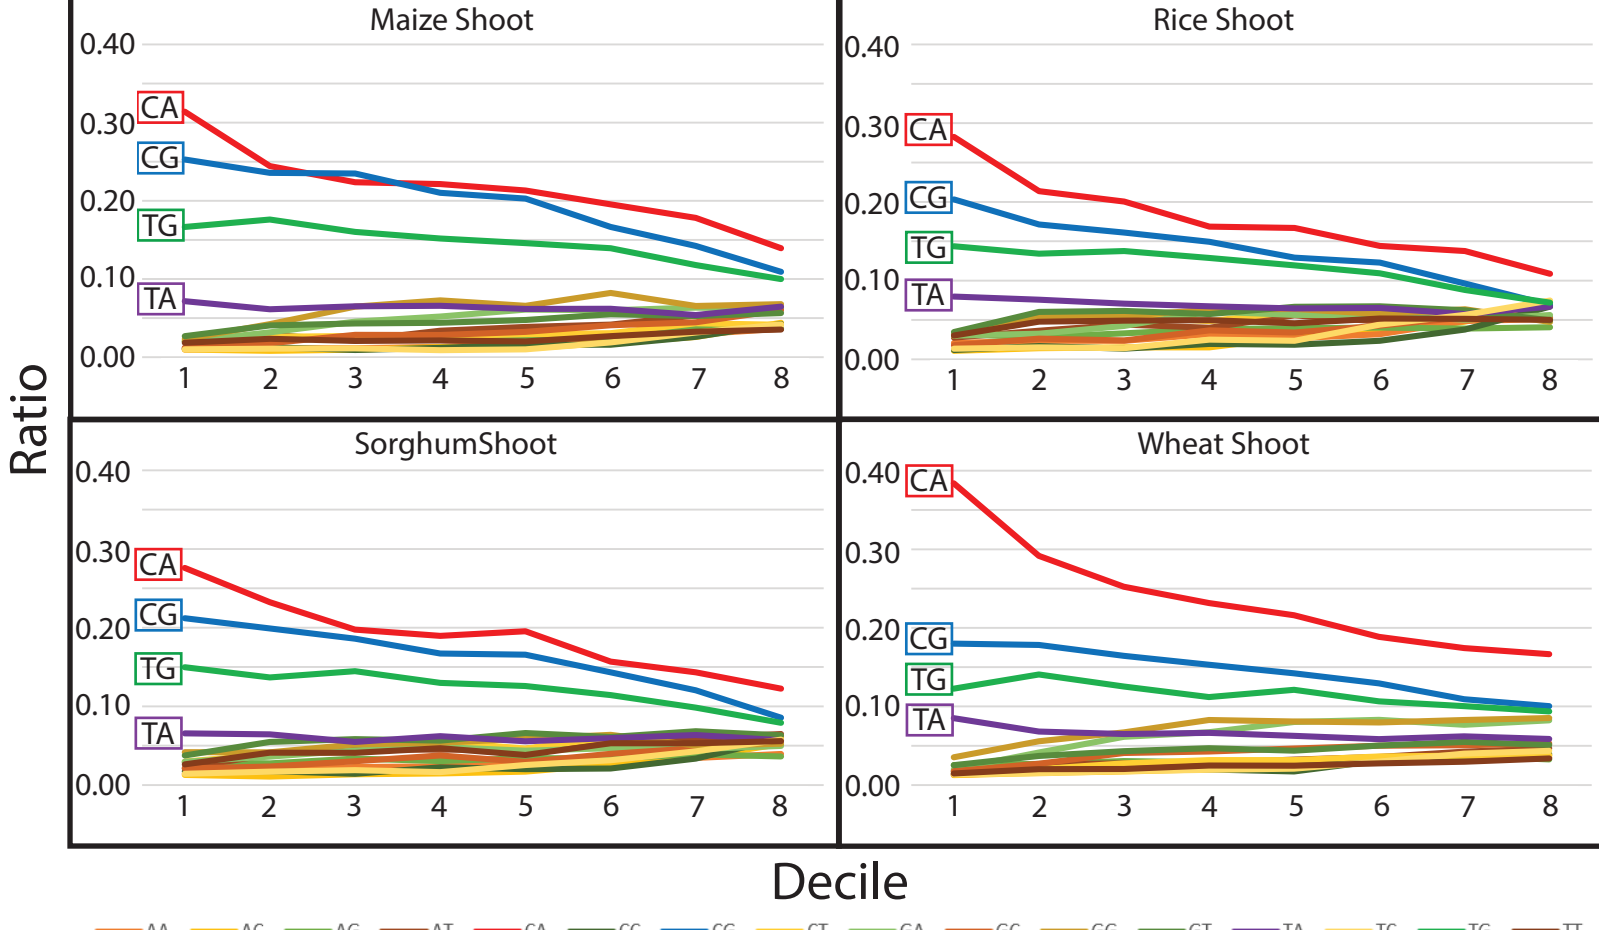

Supplementary Figure 6

Supplement: TPJ-112-583-s002.pdf [file TPJ-112-583-s002.pdf]

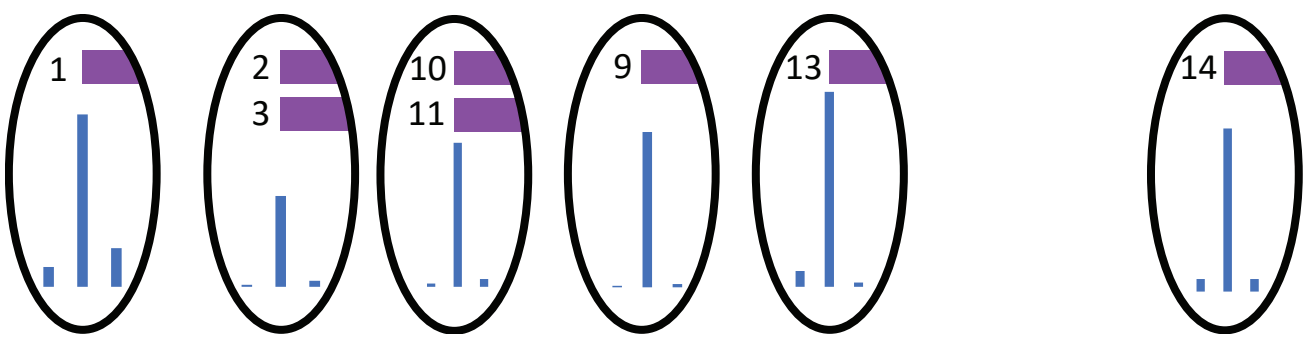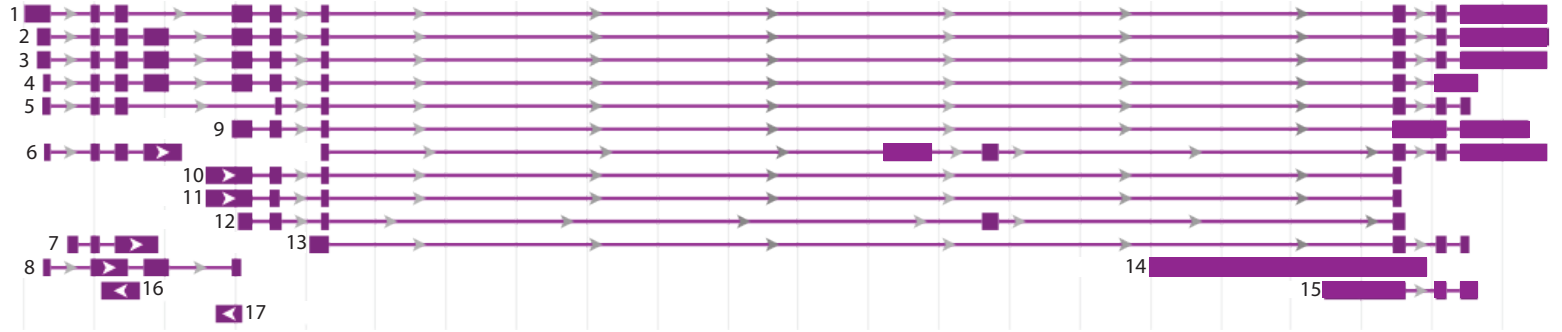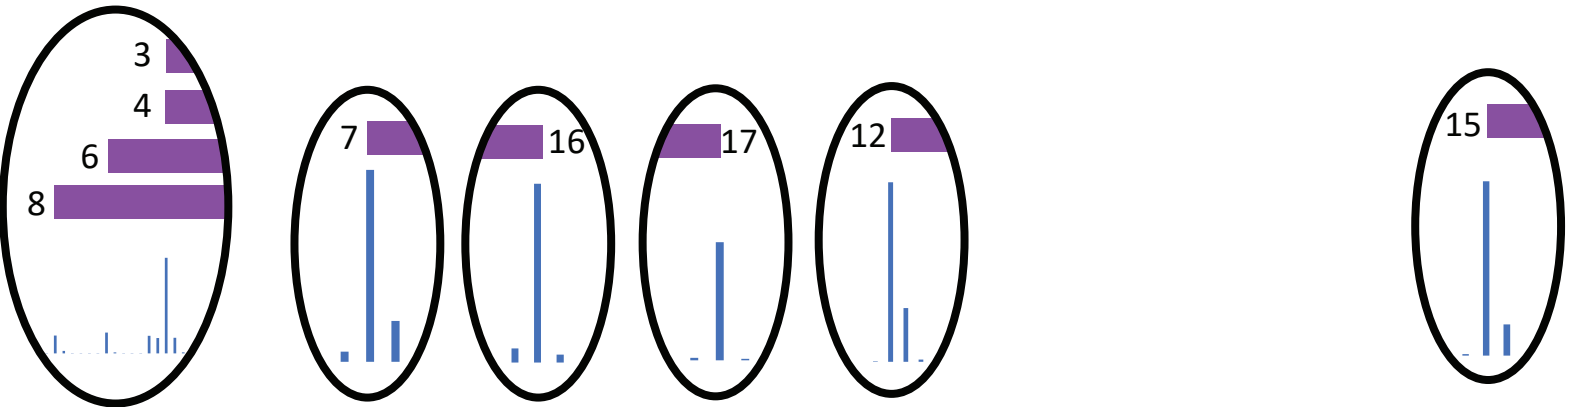

Supplementary Figure 2

Supplement: TPJ-112-583-s003.pdf [file TPJ-112-583-s003.pdf]

A

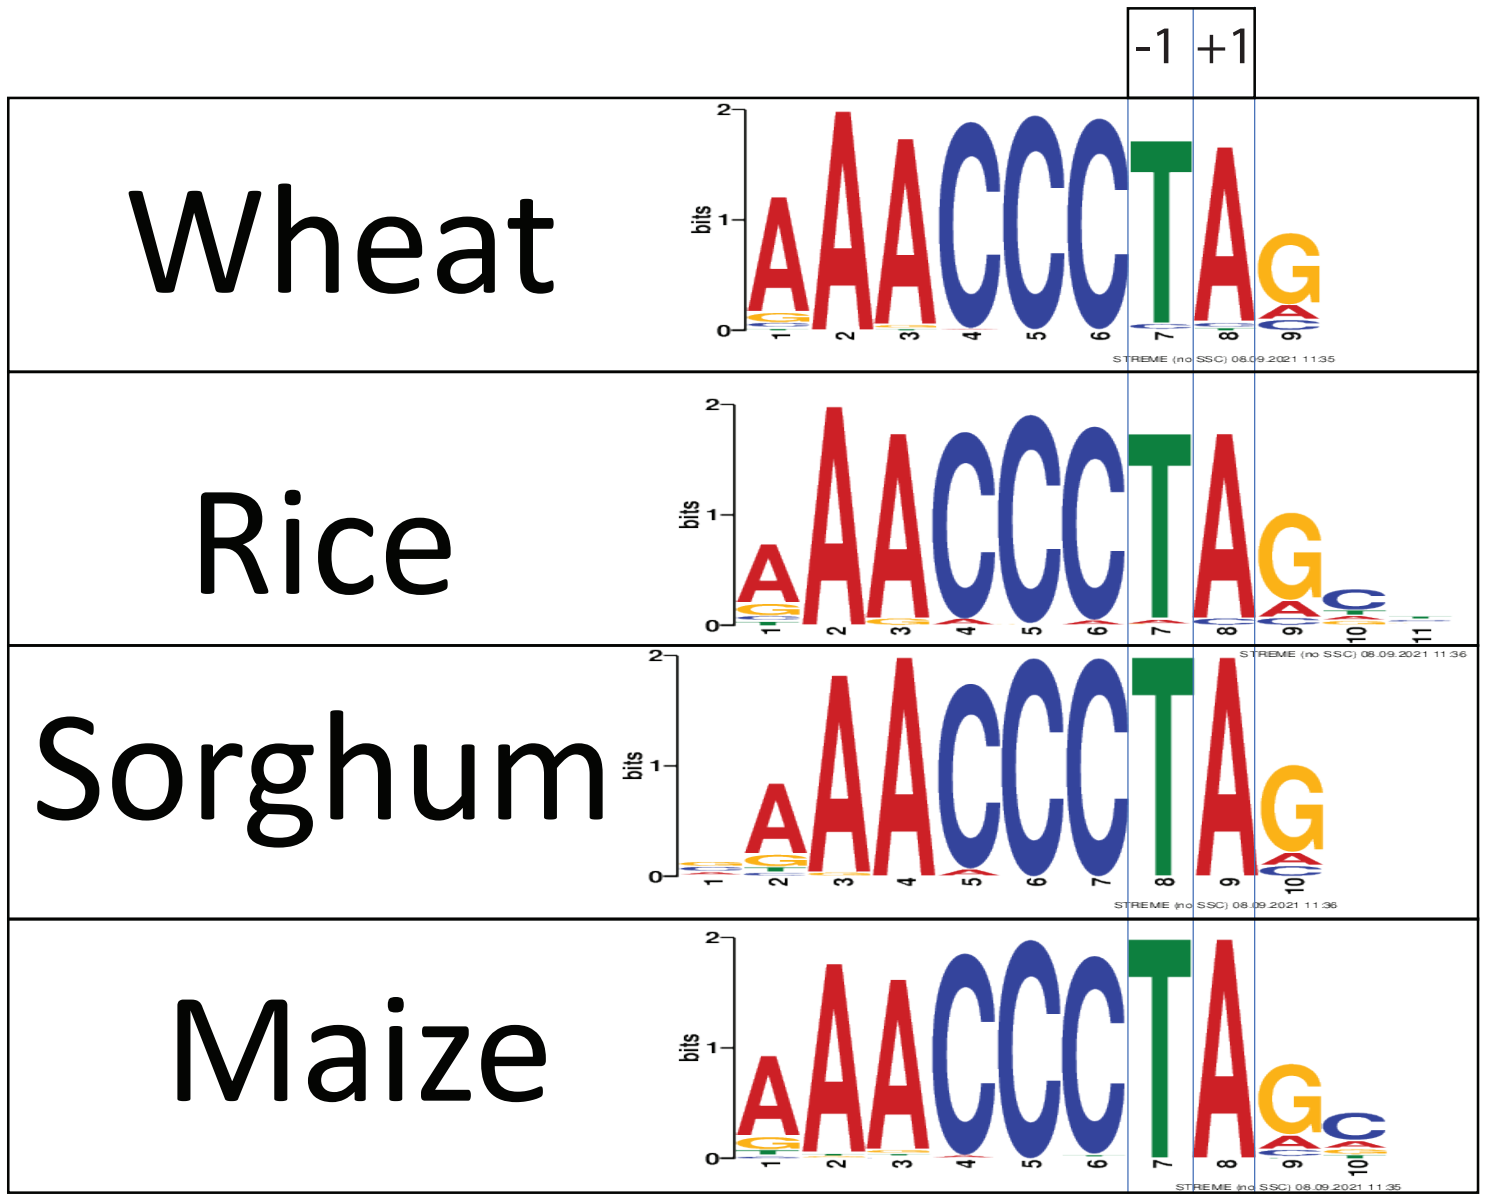

B

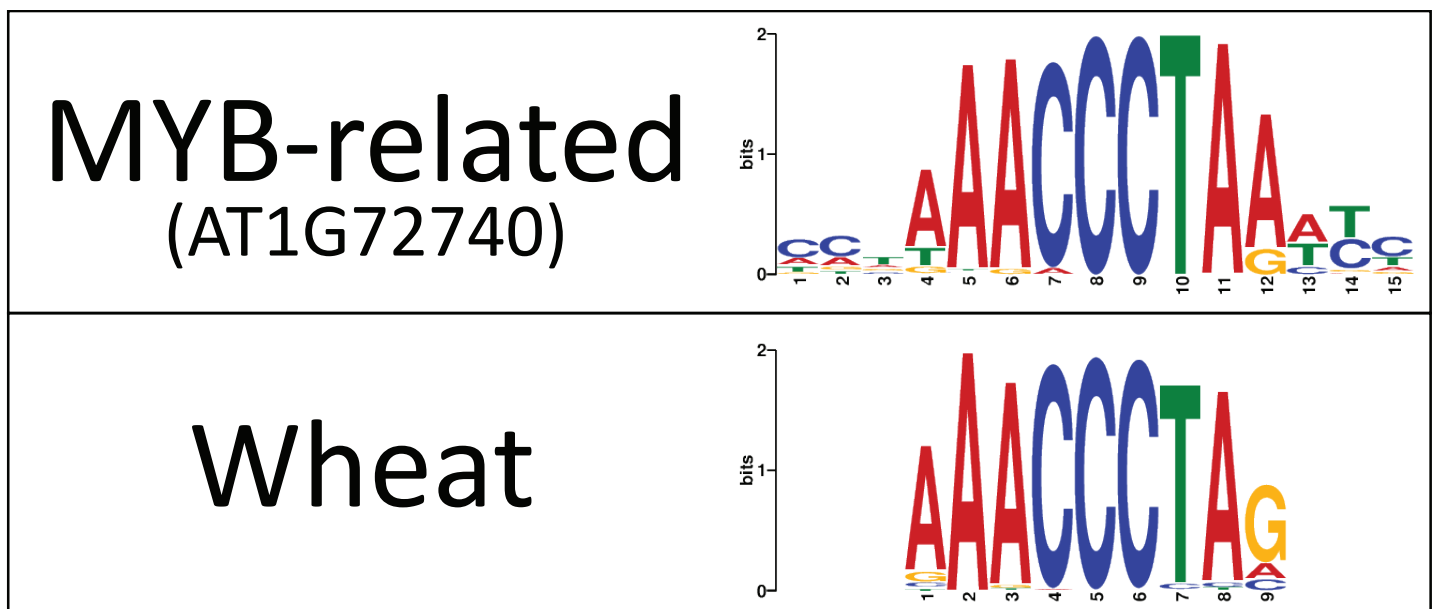

Supplement: TPJ-112-583-s006.pdf [file TPJ-112-583-s006.pdf]

CAGE

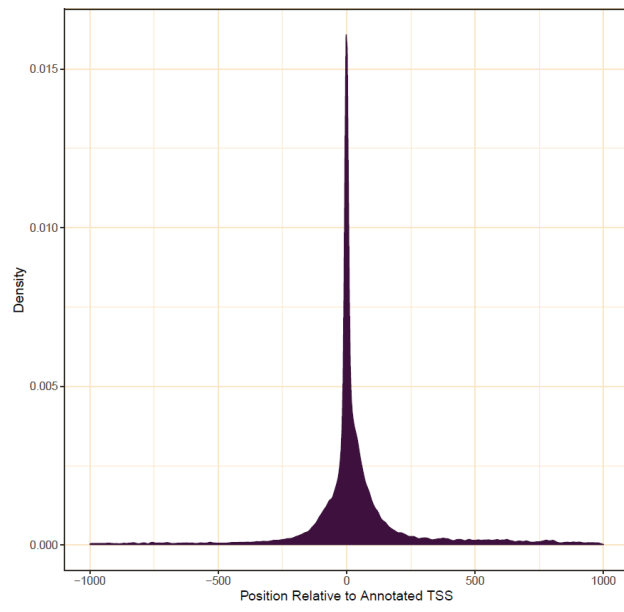

smar2C2

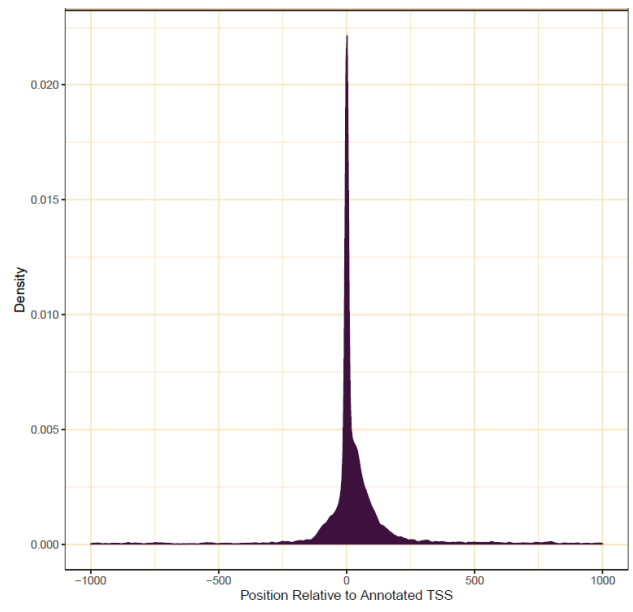

Supplementary Figure 3

Supplement: TPJ-112-583-s007.pdf [file TPJ-112-583-s007.pdf]

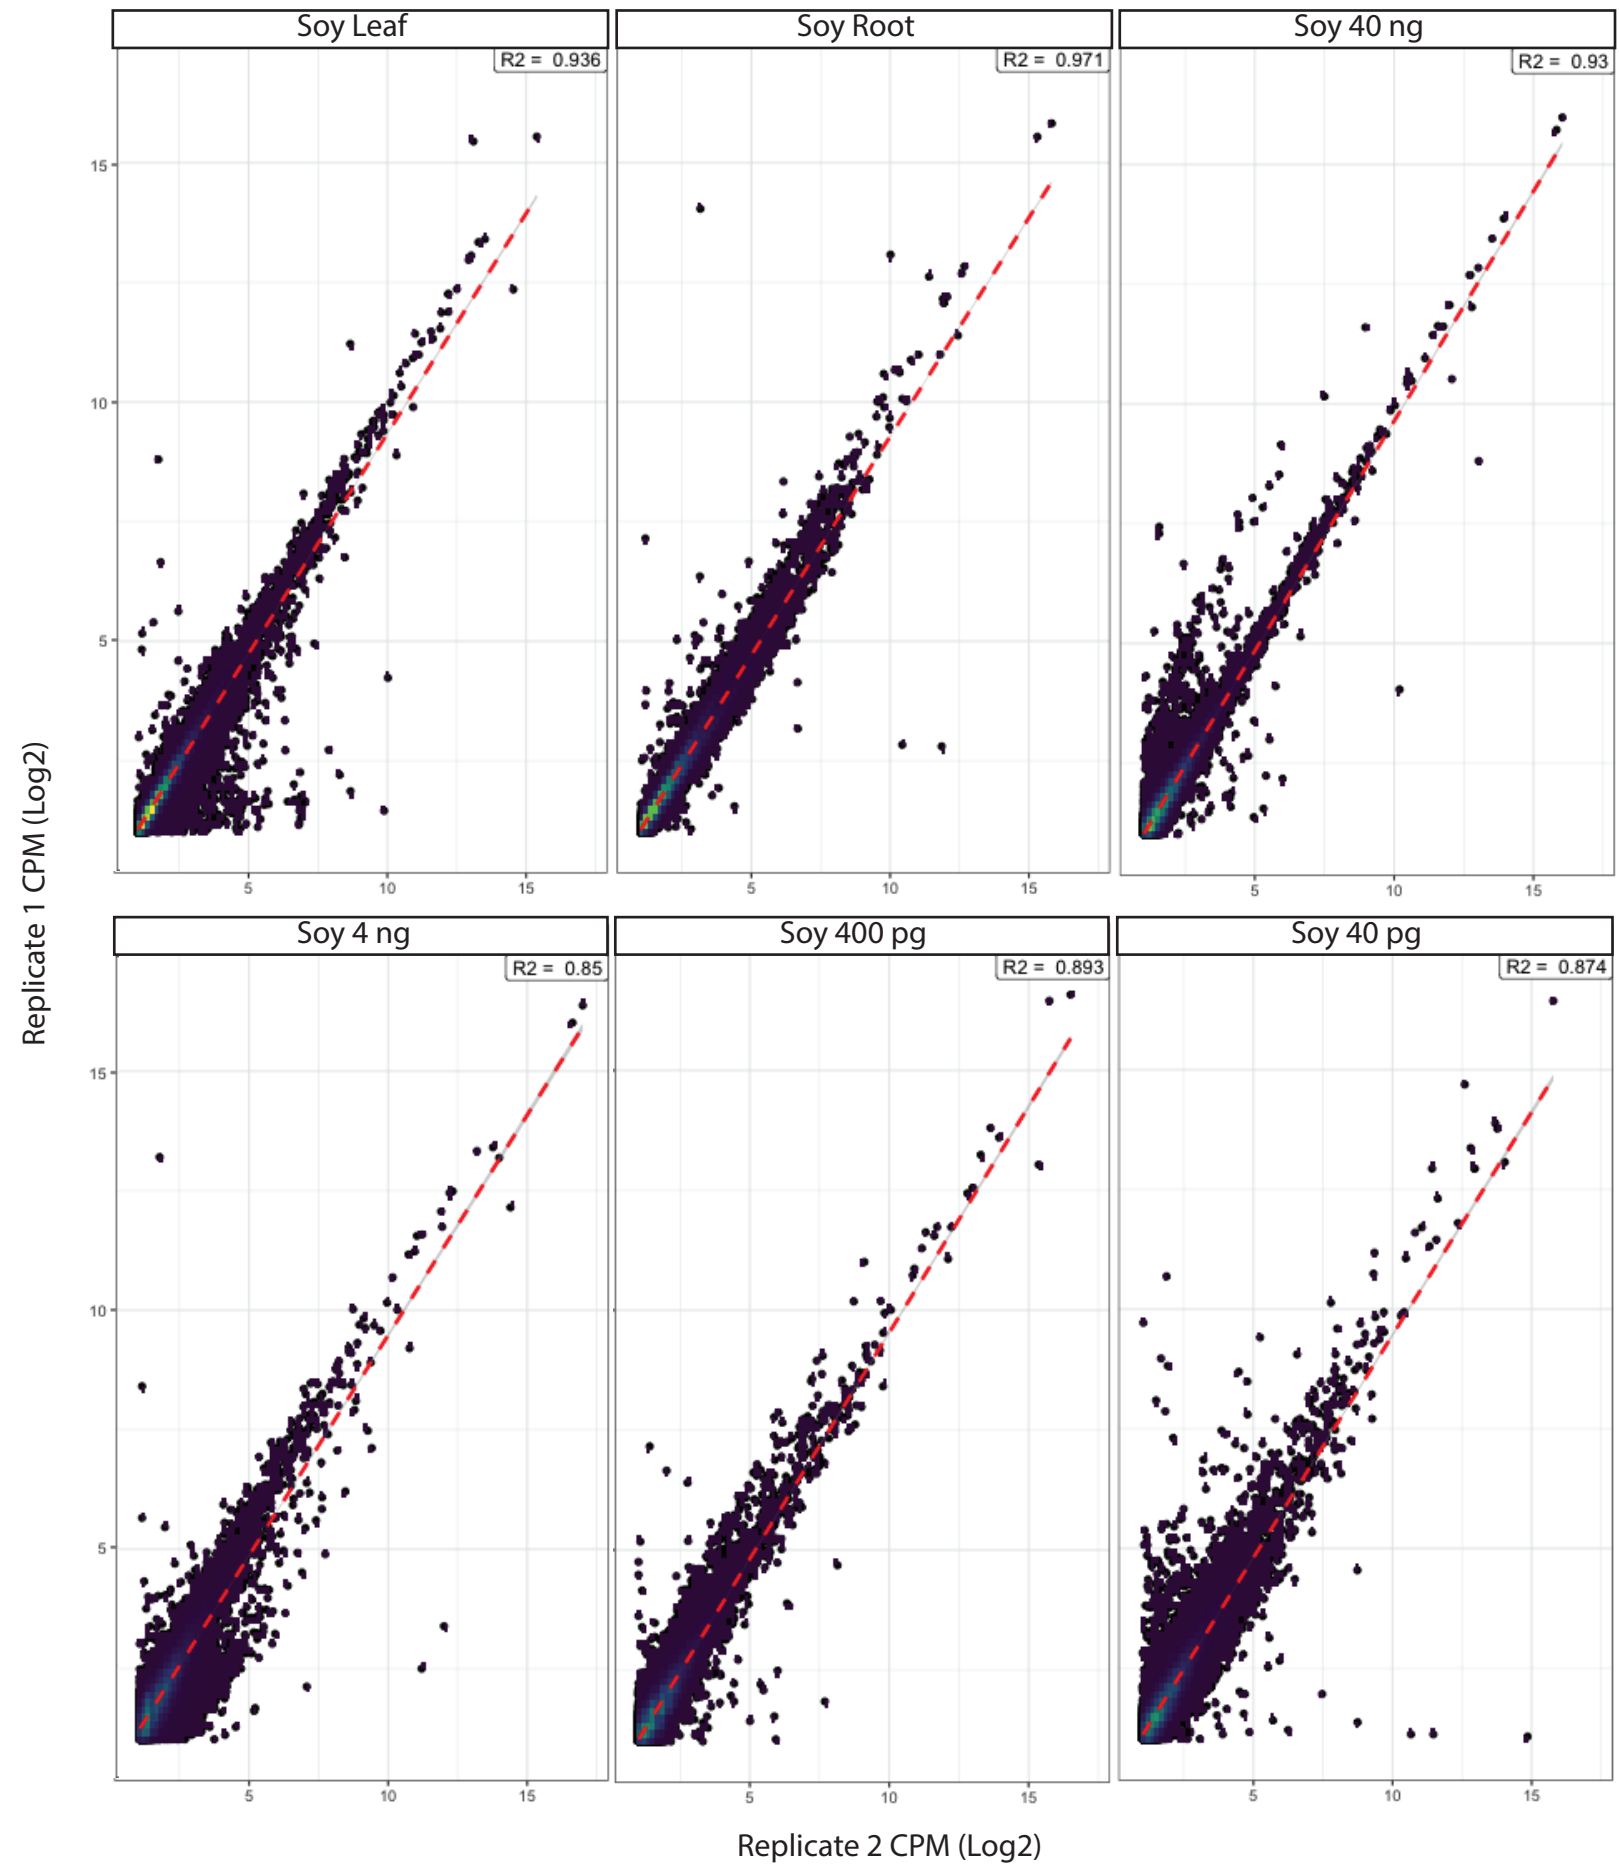

Supplementary Figure 1

Supplement: TPJ-112-583-s008.pdf [file TPJ-112-583-s008.pdf]
